# Supplementary material
Source: HighWire-hosted journal article supplement (https://bmjopen.bmj.com/content/12/10/e064352)
Supplement: inline-supplementary-material-1 [file inline-supplementary-material-1.pdf]

Supplementary File

Table S1. Matrix of bivariate correlations between all study variables (outcomes, predictors and covariates)

|                                        | 1           | 2           | 3           | 4           | 5           | 6           | 7           | 8           | 9           | 10          | 11          | 12         | 13          | 14          | 15          | 16          | 17          | 18          | 19          | 20          | 21         | 22         | 23          | 24          | 25 |
|----------------------------------------|-------------|-------------|-------------|-------------|-------------|-------------|-------------|-------------|-------------|-------------|-------------|------------|-------------|-------------|-------------|-------------|-------------|-------------|-------------|-------------|------------|------------|-------------|-------------|----|
| 1. Alcohol consumption                 |             |             |             |             |             |             |             |             |             |             |             |            |             |             |             |             |             |             |             |             |            |            |             |             |    |
| 2. Alcohol-rel. problems <sup>A</sup>  | <b>.49</b>  |             |             |             |             |             |             |             |             |             |             |            |             |             |             |             |             |             |             |             |            |            |             |             |    |
| 3. Working hours                       | .02         | -.01        |             |             |             |             |             |             |             |             |             |            |             |             |             |             |             |             |             |             |            |            |             |             |    |
| 4. Day job, no weekends <sup>B</sup>   | <b>-.05</b> | <b>-.05</b> | .02         |             |             |             |             |             |             |             |             |            |             |             |             |             |             |             |             |             |            |            |             |             |    |
| 5. Evening job <sup>B</sup>            | .01         | .02         | <b>-.05</b> | <b>-.11</b> |             |             |             |             |             |             |             |            |             |             |             |             |             |             |             |             |            |            |             |             |    |
| 6. Night job <sup>B</sup>              | -.01        | .01         | -.01        | <b>-.21</b> | -.01        |             |             |             |             |             |             |            |             |             |             |             |             |             |             |             |            |            |             |             |    |
| 7. Shift work <sup>B</sup>             | <b>.04</b>  | <b>.04</b>  | <b>-.08</b> | <b>-.79</b> | <b>-.03</b> | <b>-.06</b> |             |             |             |             |             |            |             |             |             |             |             |             |             |             |            |            |             |             |    |
| 8. Job position <sup>C</sup>           | <b>.04</b>  | <b>-.03</b> | <b>.24</b>  | <b>.12</b>  | <b>-.03</b> | <b>-.06</b> | <b>-.14</b> |             |             |             |             |            |             |             |             |             |             |             |             |             |            |            |             |             |    |
| 9. Job size <sup>D</sup>               | <b>.08</b>  | <b>.04</b>  | <b>.25</b>  | <b>.20</b>  | <b>-.10</b> | <b>-.25</b> | <b>-.15</b> | <b>.19</b>  |             |             |             |            |             |             |             |             |             |             |             |             |            |            |             |             |    |
| 10. Income                             | .01         | <b>-.08</b> | <b>.14</b>  | <b>.13</b>  | <b>-.04</b> | <b>-.05</b> | <b>-.13</b> | <b>.21</b>  | <b>.11</b>  |             |             |            |             |             |             |             |             |             |             |             |            |            |             |             |    |
| 11. Psych. job demands                 | -.02        | -.00        | <b>.23</b>  | <b>-.05</b> | -.00        | <b>-.06</b> | .03         | <b>.17</b>  | <b>.07</b>  | <b>.05</b>  |             |            |             |             |             |             |             |             |             |             |            |            |             |             |    |
| 12. Job control                        | -.01        | <b>-.04</b> | <b>.15</b>  | <b>.10</b>  | -.01        | <b>-.08</b> | <b>-.12</b> | <b>.14</b>  | <b>.08</b>  | <b>.17</b>  | <b>.14</b>  |            |             |             |             |             |             |             |             |             |            |            |             |             |    |
| 13. Work. social support               | .01         | <b>-.03</b> | .00         | <b>.06</b>  | -.01        | <b>-.03</b> | <b>-.05</b> | .00         | -.00        | <b>.05</b>  | <b>-.06</b> | <b>.34</b> |             |             |             |             |             |             |             |             |            |            |             |             |    |
| 14. Leadership qualities               | -.02        | <b>-.03</b> | -.02        | .02         | -.01        | <b>-.04</b> | -.01        | -.01        | -.01        | .01         | <b>-.10</b> | <b>.23</b> | <b>.61</b>  |             |             |             |             |             |             |             |            |            |             |             |    |
| 15. Job travels <sup>E</sup>           | <b>.07</b>  | .02         | <b>.13</b>  | <b>.09</b>  | -.02        | <b>-.05</b> | <b>-.11</b> | <b>.16</b>  | <b>.13</b>  | <b>.15</b>  | <b>-.05</b> | <b>.14</b> | .01         | -.01        |             |             |             |             |             |             |            |            |             |             |    |
| 16. Working from home <sup>E</sup>     | .02         | -.00        | <b>.12</b>  | <b>.04</b>  | -.01        | <b>-.03</b> | <b>-.09</b> | <b>.11</b>  | <b>.04</b>  | <b>.10</b>  | <b>.06</b>  | <b>.13</b> | .01         | -.01        | <b>.25</b>  |             |             |             |             |             |            |            |             |             |    |
| 17. Work. holiday home <sup>E</sup>    | <b>.06</b>  | .01         | <b>.12</b>  | -.03        | -.01        | -.02        | -.02        | <b>.10</b>  | <b>.05</b>  | <b>.11</b>  | <b>.07</b>  | <b>.06</b> | -.02        | -.02        | <b>.24</b>  | <b>.32</b>  |             |             |             |             |            |            |             |             |    |
| 18. Drinking social norms <sup>F</sup> | <b>.42</b>  | <b>.23</b>  | <b>.06</b>  | <b>-.05</b> | .02         | -.03        | <b>.04</b>  | <b>-.05</b> | <b>.07</b>  | .02         | -.01        | -.01       | .00         | .01         | <b>.09</b>  | <b>.06</b>  | <b>.03</b>  |             |             |             |            |            |             |             |    |
| 19. Gender <sup>G</sup>                | <b>-.18</b> | <b>-.14</b> | <b>-.16</b> | <b>.04</b>  | .01         | .02         | -.02        | <b>-.13</b> | <b>-.17</b> | -.02        | <b>.05</b>  | .01        | <b>.06</b>  | <b>.05</b>  | <b>-.17</b> | <b>-.03</b> | <b>-.08</b> | <b>-.16</b> |             |             |            |            |             |             |    |
| 20. Age                                | <b>-.12</b> | <b>-.13</b> | <b>.05</b>  | <b>.19</b>  | -.01        | -.01        | <b>-.20</b> | <b>.18</b>  | .00         | <b>.10</b>  | <b>-.07</b> | -.02       | <b>-.09</b> | <b>-.10</b> | .03         | -.02        | <b>.05</b>  | <b>-.25</b> | <b>-.04</b> |             |            |            |             |             |    |
| 21. Educational attainment             | <b>-.03</b> | -.03        | <b>.18</b>  | <b>.15</b>  | -.03        | <b>-.07</b> | <b>-.18</b> | <b>.09</b>  | <b>.13</b>  | <b>.29</b>  | <b>.10</b>  | <b>.30</b> | <b>.08</b>  | <b>.04</b>  | <b>.16</b>  | <b>.14</b>  | <b>.06</b>  | <b>.06</b>  | .01         | <b>-.07</b> |            |            |             |             |    |
| 22. Living status <sup>H</sup>         | <b>-.07</b> | <b>-.12</b> | .02         | <b>.07</b>  | -.01        | -.02        | <b>-.06</b> | <b>.06</b>  | -.02        | <b>.50</b>  | .01         | <b>.07</b> | <b>.03</b>  | .03         | <b>.03</b>  | .01         | <b>.03</b>  | <b>-.04</b> | -.01        | -.02        | <b>.03</b> |            |             |             |    |
| 23. Marital status <sup>I</sup>        | <b>-.14</b> | <b>-.15</b> | <b>.04</b>  | <b>.14</b>  | -.01        | -.02        | <b>-.15</b> | <b>.13</b>  | -.02        | <b>.46</b>  | .00         | <b>.08</b> | .01         | -.00        | <b>.06</b>  | <b>.03</b>  | <b>.04</b>  | <b>-.12</b> | <b>-.04</b> | <b>.26</b>  | <b>.07</b> | <b>.46</b> |             |             |    |
| 24. Number of children                 | <b>-.16</b> | <b>-.17</b> | <b>.03</b>  | <b>.15</b>  | -.02        | -.01        | <b>-.15</b> | <b>.14</b>  | -.02        | <b>.31</b>  | -.01        | <b>.07</b> | -.01        | -.01        | <b>.06</b>  | <b>.04</b>  | <b>.04</b>  | <b>-.20</b> | .00         | <b>.40</b>  | .01        | <b>.33</b> | <b>.42</b>  |             |    |
| 25. Year of data collection            | .01         | .01         | <b>-.10</b> | <b>-.12</b> | <b>.04</b>  | <b>.04</b>  | <b>.16</b>  | .00         | <b>-.04</b> | <b>-.07</b> | .02         | <b>.06</b> | <b>.07</b>  | <b>.09</b>  | <b>-.15</b> | <b>-.06</b> | -.01        | <b>-.04</b> | <b>.14</b>  | <b>-.07</b> | <b>.04</b> | -.02       | <b>-.03</b> | <b>-.02</b> |    |

N = 5388; Results from non-parametric (Spearman *rho*) correlation analyses; Statistically significant correlations (*p* <.05) indicated with bold typeface; <sup>A</sup>Ref. = no problems; <sup>B</sup>Ref. = other work schedules; <sup>C</sup>Ref. = worker; <sup>D</sup>Ref. = part-time; <sup>E</sup>Ref. = no; <sup>F</sup>Higher scores indicate liberal attitudes; <sup>G</sup>Ref. = male; <sup>H</sup>Ref. = living alone; <sup>I</sup>Ref. = unmarried; For all other variables: higher scores indicate higher variable values

**Table S2.** Study selection analyses: Comparisons between completers and non-completers on sociodemographic variables

| Variable                        | Completers <sup>A</sup> | Non-completers <sup>B</sup> | <i>p</i>           |
|---------------------------------|-------------------------|-----------------------------|--------------------|
| Gender, % females               | 68.5                    | 75.7                        | <.001 <sup>C</sup> |
| Age, <i>M</i>                   | 44.8                    | 44.7                        | .946 <sup>D</sup>  |
| Education, % university/college | 77.7                    | 66.2                        | <.001 <sup>C</sup> |
| Living status, % living alone   | 15.1                    | 15.1                        | .949 <sup>C</sup>  |
| Marital status, % unmarried     | 44.8                    | 48.0                        | .005 <sup>C</sup>  |
| Children, <i>M</i>              | 1.8                     | 1.7                         | .001 <sup>D</sup>  |

<sup>A</sup>Employees who responded on all study items, i.e., the study sample (n = 5388); <sup>B</sup>Employees who responded on the sociodemographic items but not on all study items; <sup>C</sup>Difference tested with chi square tests of independence; <sup>D</sup>Difference tested with independent samples t-tests
